# Supplementary material
Source: Springer Nature journal article supplement (https://www.springermedizin.de/resource/supplementary/13046_2011_487_MOESM5_ESM.pdf/9662336)

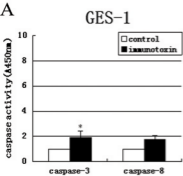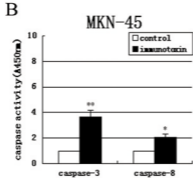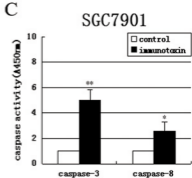

Supplement: MOESM5 [file 9662336]
